# Supplementary material
Source: MDPI journal article supplement (https://www.mdpi.com/search?q=molecules-24-01253)
Supplement: s001 [file molecules-24-01253-s001.pdf]

# Synthesis and Near Infrared Luminescence Properties of a Series of Lanthanide Complexes with POSS Modified Ligands

Qingrui Zhang <sup>1,2</sup>, Xiuyun Yang <sup>1,\*</sup>, Ruiping Deng <sup>2,\*</sup>, Liang Zhou <sup>2,\*</sup>, Yang Yu <sup>2</sup> and Yunhui Li <sup>1</sup>

<sup>1</sup> School of Chemistry and Environmental Engineering, Changchun University of Science and Technology, Changchun 130000, China; qrzhang784783@126.com (Q.Z.); liyh@cust.edu.cn (Y.L.)

<sup>2</sup> Changchun Institute of Applied Chemistry, Chinese Academy of Sciences, Changchun 130022, China; yuy@ciac.ac.cn

\* Correspondence: yangxiuyun@cust.edu.cn (X.Y.); dengrp@ciac.ac.cn (R.D.); zhoul@ciac.ac.cn (L.Z.); Tel.: +86-431-85262135

The <sup>1</sup>HNMR spectrum and MS spectrum of polyhedral oligomeric silsesquioxanes (POSS) modified 8-hydroxyquinoline derivative (Q-POSS) are shown in Figures S1 and S2, respectively. The UV–vis absorption spectra of HQ, ErQ<sub>3</sub>, NdQ<sub>3</sub>, and YbQ<sub>3</sub> in dichloromethane solutions (1 × 10<sup>-5</sup> M) at room temperature are depicted in Figure S3. The excitation spectra of the Ln(Q-POSS)<sub>3</sub> and LnQ<sub>3</sub> (Ln = Yb, Nd, and Er) complexes are depicted in Figures S4, S5, S6, respectively. The phosphorescence emission spectrum of the Gd(Q-POSS)<sub>3</sub> at 77K is shown in Figure S7.

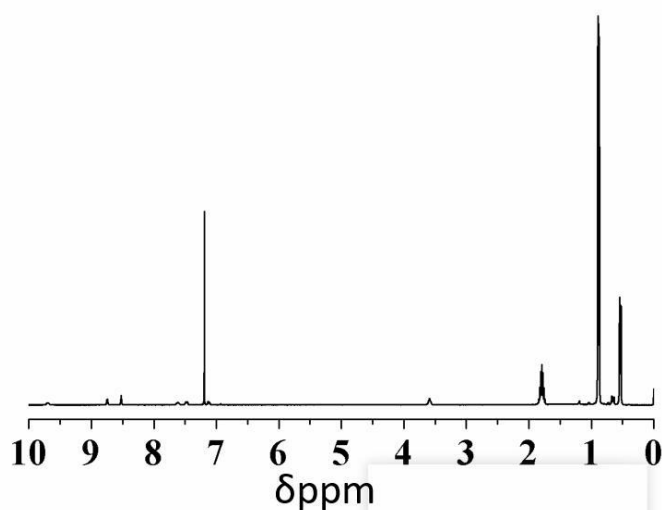

**Figure S1.** <sup>1</sup>HNMR spectrum of the polyhedral oligomeric silsesquioxanes modified 8-hydroxyquinoline derivative (Q-POSS) ligand.

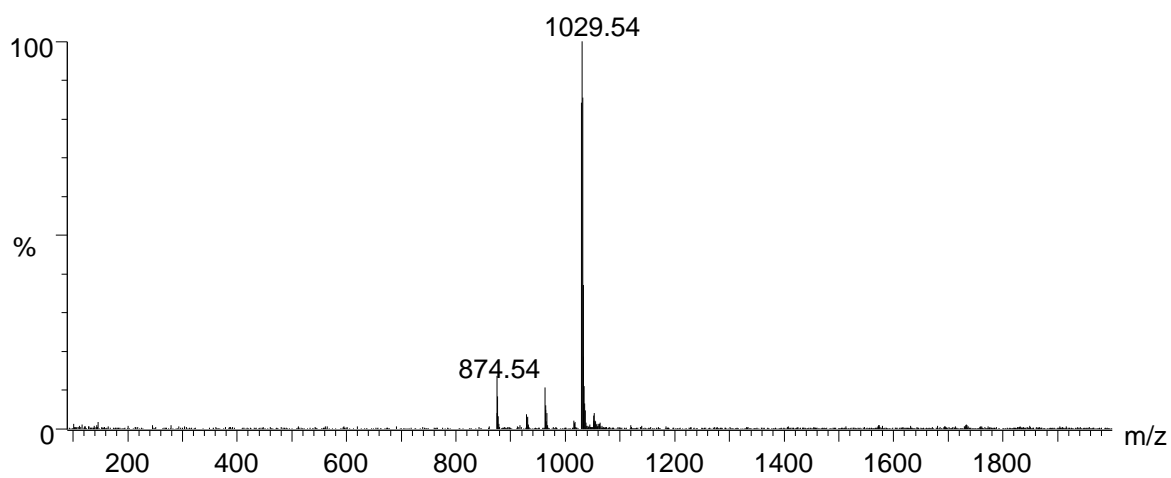

Figure S2. MALDI-TOF mass spectrum of the Q-POSS ligand.

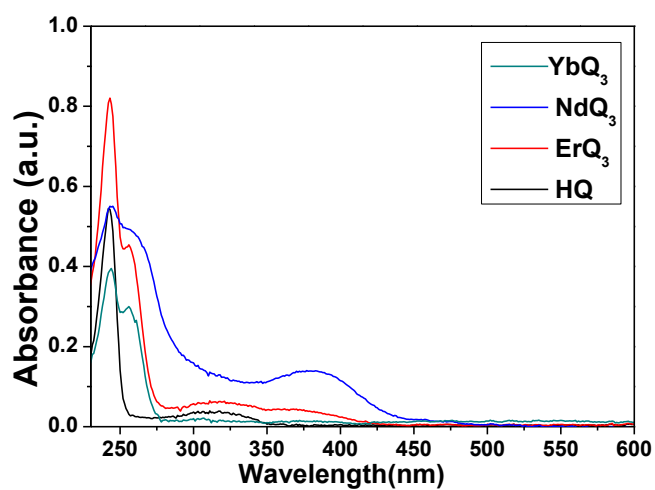

Figure S3. UV-vis absorption spectra of HQ, ErQ<sub>3</sub>, NdQ<sub>3</sub>, and YbQ<sub>3</sub> in dichloromethane solutions ( $1 \times 10^{-5}$  M) at room temperature.

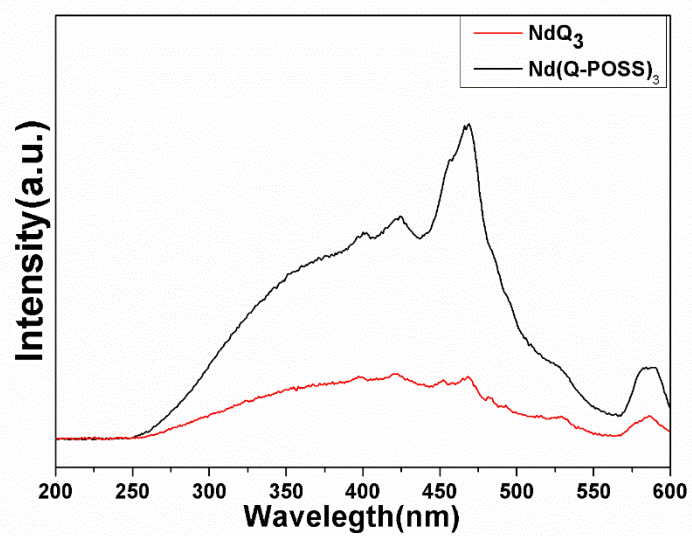

Figure S4. Excitation spectra of  $\text{NdQ}_3$  and  $\text{Nd(Q-POSS)}_3$  (monitored at 1068 nm).

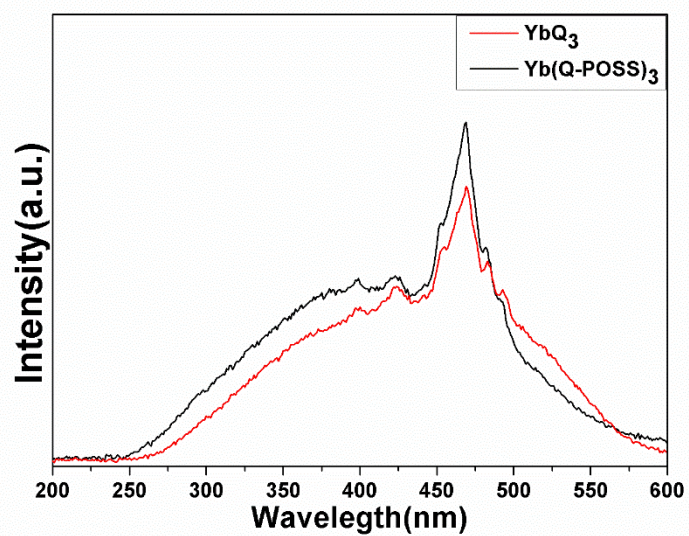

Figure S5. Excitation spectra of  $\text{YbQ}_3$  and  $\text{Yb(Q-POSS)}_3$  (monitored at 980 nm).

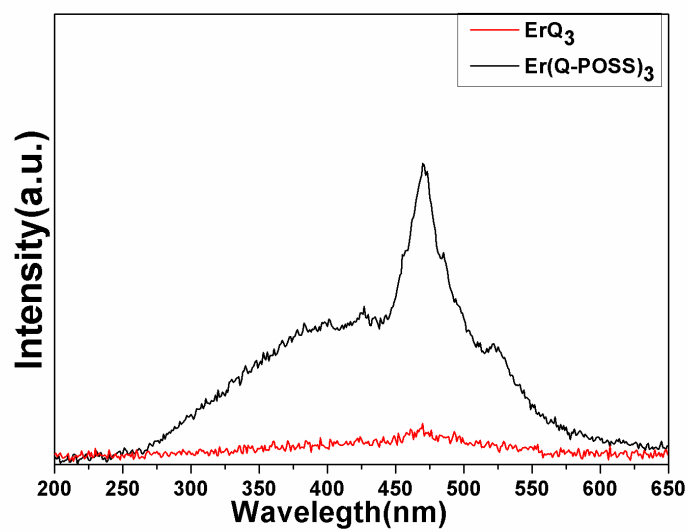

Figure S6. Excitation spectra of  $\text{ErQ}_3$  and  $\text{Er(Q-POSS)}_3$  (monitored at 1536 nm).

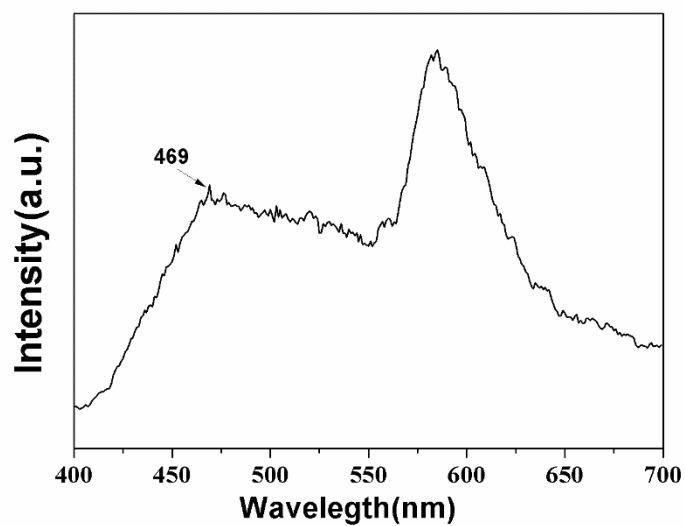

Figure S7. Emission spectrum of the  $\text{Gd(Q-POSS)}_3$  complex ( $\lambda_{\text{ex}} = 302$  nm) complex at 77 K.
